# Supplementary material
Source: publisher figshare collection journal article supplement (https://geolsoc.figshare.com/ndownloader/files/5424278)
Supplement: Supplementary file 1 [file 5424278]

Normalized wt% oxides
MI Label	Type	Size	SiO2	TiO2	Al2O3	FeO	MnO	MgO	CaO	Na2O	K2O	P2O5	SO2	Cl	F	H2O	1s	CO2	1s		Crystal label	An/Mg#/Fo	Wo	En	Fe	lowest An/Mg#		T (C )	PEC
		(um)	(wt%)	(wt%)	(wt%)	(wt%)	(wt%)	(wt%)	(wt%)	(wt%)	(wt%)	(wt%)	(ppm)	(ppm)	(ppm)	(wt%)	(wt%)	(ppm)	(ppm)			(mol%)	(mol%)	(mol%)	(mol%)	(mol%)		(C )	(wt%)
Tavurvur 2006
1a_A22-MIa	closed	42	65.48	0.78	14.74	4.98	0.16	1.31	3.39	5.21	3.14	0.33	0	3523	1236						1a_A22-Pxa	73.51	3.43	70.99	25.58	1a_A22-Pxb	72.32
1a_B19_MI-a	closed	26	65.33	0.95	14.21	5.91	0.17	1.50	3.23	4.75	3.18	0.34	559	3131	610						1a_B19_Px-a	70.95	2.69	69.05	28.26	1a_B19_Px-c	69.86
1a_B19_MI-b	closed	20	65.32	0.98	13.92	6.19	0.12	1.63	3.23	4.74	3.16	0.28	626	3627	0						1a_B19_Px-b	70.73	3.15	68.50	28.35	1a_B19_Px-c	69.86
1a_B19_MI-c	closed	32	65.30	0.93	14.00	6.03	0.17	1.28	3.25	5.00	3.28	0.30	426	3614	487						1a_B19_Px-c	69.86	2.83	67.89	29.28	1a_B19_Px-c	69.86
1a_B19_MI-d	closed	25	65.45	0.87	14.19	6.04	0.16	1.33	3.34	4.52	3.23	0.33	853	3493	1048						1a_B19_Px-d	71.35	2.87	69.30	27.83	1a_B19_Px-c	69.86
1a_B21_MI-a	closed	30	66.71	0.87	16.03	5.71	0.11	1.51	4.29	0.99	3.08	0.28	864	3447	0	3.30	0.02	167	5		1a_B21_Px-a	73.75	44.70	40.79	14.52	1a_B21_Px-b	71.96
1a_B21_MI-b	closed															1.50	0.01	24	2
1a_B21_MI-c	closed	39	62.52	0.96	15.64	5.65	0.16	1.62	4.12	5.34	3.10	0.28	1245	3970	918	2.08	0.01	160	5		1a_B21_Px-c	74.01	43.80	41.59	14.61	1a_B21_Px-b	71.96
1a_B21_MI-e	closed	33	65.51	0.89	14.84	5.15	0.10	1.23	3.32	5.18	3.20	0.29	30	2871	0						1a_B21_Px-e	76.34	42.46	43.93	13.62	1a_B21_Px-b	71.96
1a_B21_MI-f	closed	30	65.35	0.81	14.09	5.50	0.19	1.17	3.17	5.88	3.18	0.30	41	3499	0						1a_B21_Px-f	73.60	41.18	43.29	15.53	1a_B21_Px-b	71.96
1a_B22_MI-a	closed	24	54.63	1.28	17.66	9.61	0.15	3.32	7.57	3.61	1.47	0.25	2567	1614	356	1.49	0.02	75	3		1a_B22_Px-a	80.51	44.84	44.41	10.75	1a_B22_Px-a	80.51
1a_B22_MI-b	closed	21	59.74	1.25	15.18	7.82	0.22	2.90	6.51	3.53	2.06	0.36	1244	2394	784	1.48	0.03	522	53		1a_B22_Px-b	72.60	39.10	44.21	16.69	1a_B22_Px-b	72.60
1a_C3_MI-b	closed	28	65.87	0.40	15.34	6.09	0.18	1.26	4.13	4.60	1.41	0.33	1882	2028	0						1a_C3_Px-b	74.54	42.87	42.58	14.54	1a_C3_Px-g	72.18
1a_C3_MI-e	closed	20	59.37	0.89	18.09	6.84	0.07	2.42	6.05	4.40	1.21	0.26	1847	1631	547						1a_C3_Px-e	75.25	44.00	42.14	13.86	1a_C3_Px-g	72.18
1a_C3_MI-f	closed	22	64.38	0.82	14.23	5.84	0.18	1.80	4.28	4.74	2.88	0.29	840	3258	1322						1a_C3_Px-f	72.33	40.76	42.85	16.39	1a_C3_Px-g	72.18
1a_C12_MI-c	closed	68	64.29	0.79	14.42	5.88	0.13	1.76	4.28	4.62	2.85	0.43	1668	2760	1165						1a_C12_Px-b	73.08	40.88	43.20	15.92	1a_C12_Px-b	73.08
1a_C12_MI-d	closed	37	62.74	0.91	14.65	6.62	0.22	1.83	4.47	4.91	2.46	0.50	2320	3048	1550						1a_C12_Px-d	75.19	41.59	43.91	14.49	1a_C12_Px-b	73.08
1a_D5_MI-a	closed	38	65.60	0.86	14.28	6.03	0.17	1.24	3.30	4.55	3.03	0.38	1590	3608	397	1.86	0.00	415	16		1a_D5_Px-a	72.23	40.44	43.02	16.54	1a_D5_Px-a	72.23
1a_D5_MI-b	closed	18	67.06	0.77	14.85	4.34	0.16	0.98	3.13	4.76	3.00	0.33	1769	3821	691						1a_D5_Px-b	72.99	42.24	42.16	15.60	1a_D5_Px-a	72.23
11-1s_px1-m1	closed	19	62.71	1.14	15.63	6.43	0.18	1.07	2.74	5.66	3.61	0.35	278	3867	646						11-1s_px1-3	79.74	45.71	43.29	11.00	11-1s_px1-1	73.47
11-1t_px1-m1	closed	24	66.25	0.93	14.69	4.95	0.14	1.02	2.83	4.80	3.52	0.27	1016	3667	1325						11-1t_px1-1	75.44	42.89	43.09	14.03	11-1t_px1-5	70.63
11-1t_px1-m2	closed	14	66.94	0.90	15.31	4.78	0.16	0.81	2.47	4.15	3.59	0.26	996	3612	1791						11-1t_px1-2	75.46	42.89	43.09	14.02	11-1t_px1-5	70.63
11-1t_px1-m3	closed	12	69.32	0.90	14.74	4.02	0.10	0.47	1.84	3.85	4.13	0.10	171	4083	996						11-1t_px1-3	75.79	42.62	43.49	13.89	11-1t_px1-5	70.63
11-1t_px1-m4	closed	11	70.17	0.75	14.74	3.88	0.10	0.51	1.77	3.29	4.23	0.11	374	4080	0						11-1t_px1-4	75.86	42.47	43.65	13.89	11-1t_px1-5	70.63
11-1t_px1-m5	closed	31	66.14	0.90	14.45	5.01	0.15	1.10	2.95	4.71	3.68	0.31	1067	3551	1416						11-1t_px1-5	70.63	42.76	40.43	16.81	11-1t_px1-5	70.63
11-1t_px1-m6	closed	42	66.24	0.89	14.46	5.05	0.12	1.18	2.86	4.76	3.63	0.26	654	3556	1416						11-1t_px1-6	76.22	42.74	43.64	13.62	11-1t_px1-5	70.63
11-1t_px1-m7	closed	22	66.67	1.04	15.32	4.78	0.13	0.87	2.80	3.99	3.59	0.29	1003	3911	411						11-1t_px1-7	72.91	41.91	42.35	15.73	11-1t_px1-5	70.63
11-1t_pl1-m1	closed	29	66.37	0.83	14.57	4.49	0.16	1.19	3.02	4.86	3.81	0.28	552	3380	271						11-1t_pl1-3	50.58				11-1t_pl1-3	50.58
11-1t_pl2-m2	closed	20	66.22	0.79	15.13	4.46	0.15	1.25	2.87	4.16	4.00	0.35	1057	3853	1200						11-1t_pl2a Line 025	55.60				11-1t_pl2a Line 002	47.52
11-1t_pl3-m1	closed	12	67.42	0.70	14.55	4.24	0.12	1.15	2.77	4.42	3.99	0.20	857	3548	0						11-1t_pl3a Line 020	46.66				11-1t_pl3a Line 022	45.31
11-1t_pl4-m1	closed	24	66.43	0.82	15.13	4.35	0.17	1.21	2.96	4.18	3.98	0.31	1011	3226	364						11-1t_pl4-2	53.58				11-1t_pl4-1	46.98
11-1t_pl8-m1	closed	46	63.05	0.98	14.99	5.90	0.19	1.67	3.73	4.83	3.62	0.35	1536	4498	819						11-1t_pl8-4	59.52				11-1t_pl8-2	49.89
11-1t_pl8-m2	closed	25	64.65	0.92	14.95	5.01	0.17	1.58	3.56	4.71	3.54	0.37	1270	3680	560						11-1t_pl8-2	49.89				11-1t_pl8-2	49.89
11-1t_pl8-m3	closed	77	64.57	1.00	14.89	5.08	0.15	1.54	3.47	4.74	3.58	0.37	1342	3986	621						11-1t_pl8-3	56.93				11-1t_pl8-2	49.89
1a_A10_MI-a	closed	71	65.89	0.91	14.37	4.84	0.15	1.16	3.55	5.00	3.33	0.30	902	3305	871						1a_A10_Pl-a	88.54				1a_A10_Pl-b Line 013	51.48
1a_A11_MI-a	closed	25	64.26	0.99	14.40	5.73	0.14	1.56	3.89	4.83	3.13	0.44	1332	4101	671						1a_A11_Pl-a	55.36				1a_A11_Pl-a	55.36
1a_A11_MI-b	closed	30	63.85	0.96	14.83	5.87	0.13	1.43	3.90	4.86	3.14	0.40	1098	4297	1004						1a_A11_Pl-b	60.31				1a_A11_Pl-a	55.36
1a_A11_MI-c	closed	40	65.91	0.88	14.46	5.09	0.13	1.28	3.39	4.92	3.17	0.28	882	3384	654						1a_A11_Pl-c	55.60				1a_A11_Pl-a	55.36
1a_A12-MIa	closed	50	65.70	0.89	15.02	4.53	0.14	1.26	3.67	4.79	3.15	0.33	1297	3421	572												0.00
1a_A12-MIc	closed	70	65.24	1.00	15.11	4.77	0.17	1.33	3.64	4.76	3.23	0.34	284	3522	129												0.00
1a_A19_MI-a	closed	30	68.00	0.94	15.07	5.11	0.07	1.17	3.56	2.29	3.02	0.29	0	3415	1328						1a_A19_Pl-a	50.13				1a_A19_Pl-e	39.72
1a_A19_MI-b	closed	40	65.58	0.84	14.71	4.75	0.15	1.11	3.40	5.66	3.21	0.16	802	3309	247						1a_A19_Pl-b	49.49				1a_A19_Pl-e	39.72
1a_A19_MI-c	closed	76	65.56	0.78	14.72	4.97	0.09	1.06	3.31	5.66	3.16	0.23	245	3121	1295						1a_A19_Pl-c	49.29				1a_A19_Pl-e	39.72
1a_A19_MI-d	closed	40	66.26	0.67	14.76	4.46	0.09	1.15	3.18	5.53	3.32	0.13	687	2880	902						1a_A19_Pl-d	46.14				1a_A19_Pl-e	39.72
1a_A21_MI-a	closed	70	63.42	0.00	14.76	6.46	0.20	1.67	4.10	5.37	3.15	0.29	941	4475	558						1a_A21_Pl-a	54.54				1a_A21_Pl-f Line 004	50.77
1a_A21_MI-b	closed	70	62.71	0.70	14.65	6.07	0.08	1.68	4.07	5.43	3.28	0.62	1332	4601	1103						1a_A21_Pl-b	59.35				1a_A21_Pl-f Line 004	50.77
1a_A23_MI-a	closed	40	61.07	1.23	14.41	6.88	0.19	2.03	4.56	5.29	3.12	0.65	93	5291	269						1a_A23_Pl-a	77.59				1a_A23_Pl-c	50.41
1a_A23_MI-b	closed	25	60.16	1.10	16.03	6.27	0.16	1.80	5.34	5.39	2.57	0.58	1051	4583	296						1a_A23_Pl-a	77.59				1a_A23_Pl-c	50.41
1a_A23_MI-c	closed	37	60.62	1.57	14.34	7.52	0.13	1.87	4.35	5.30	3.12	0.46	1390	5139	797						1a_A23_Pl-b	77.10				1a_A23_Pl-c	50.41
1a_A23_MI-d	closed	80	63.12	0.67	14.28	6.07	0.19	1.71	4.07	5.54	2.95	0.74	1390	4233	1009						1a_A23_Pl-d	72.91				1a_A23_Pl-c	50.41
1a_A24_MI-a	closed	45	61.73	1.14	14.57	7.01	0.11	1.88	4.28	5.46	2.89	0.25	1356	4612	904						1a_A24_Pl-a	54.73				1a_A24_Pl-b	48.99
1a_A24_MI-b	closed	30	62.93	0.43	14.58	6.51	0.00	1.82	4.25	5.45	2.94	0.42	1453	4526	747						1a_A24_Pl-b	48.99				1a_A24_Pl-b	48.99
1a_A24_MI-c	closed	20	60.18	1.37	14.53	7.49	0.16	2.17	4.68	5.11	2.88	0.65	1384	4973	1302						1a_A24_Pl-c	49.48				1a_A24_Pl-b	48.99
1a_A24_MI-d	closed	35	61.42	0.56	15.10	6.78	0.16	1.93	4.52	5.48	3.02	0.38	1454	4550	654						1a_A24_Pl-d	57.70				1a_A24_Pl-b	48.99
1a_A24_MI-e	closed	40	62.37	1.03	14.41	6.64	0.08	1.77	4.09	5.60	2.93	0.41	1402	4308	996						1a_A24_Pl-e	56.87				1a_A24_Pl-b	48.99
1a_A25_MI-a	closed	25	60.88	1.12	13.49	8.32	0.12	2.48	4.59	4.77	2.96	0.37	1816	5871	1259						1a_A25_Pl-a	71.28				1a_A25_Pl-g	49.71
1a_A25_MI-b	closed	15	59.01	1.15	13.74	9.96	0.16	2.84	4.74	4.45	2.83	0.39	72	6040	1022						1a_A25_Pl-b	74.90				1a_A25_Pl-g	49.71
1a_A25_MI-c	closed	18	59.26	1.33	13.93	9.10	0.30	2.54	4.60	4.89	3.09	0.36	267	5626	185						1a_A25_Pl-c	52.72				1a_A25_Pl-g	49.71
1a_A25_MI-d	closed	35	62.21	1.25	14.16	6.68	0.17	1.69	4.05	5.72	3.02	0.50	72	4483	944						1a_A25_Pl-d	52.65				1a_A25_Pl-g	49.71
1a_A25_MI-e	closed	32	59.14	1.18	15.02	7.94	0.23	2.43	5.36	5.13	2.66	0.39	236	4674	164						1a_A25_Pl-e	55.42				1a_A25_Pl-g	49.71
1a_B10_MI-a	closed	40	60.20	1.56	13.94	8.40	0.22	2.28	4.43	5.08	2.92	0.32	102	5503	880						1a_B10_Pl-a	74.38				1a_B10_Pl-b	54.65
1a_B10_MI-b	closed	40	60.58	1.31	13.92	7.66	0.23	2.18	4.37	5.42	3.12	0.60	134	5522	548	2.28	0.01	118	3		1a_B10_Pl-b	54.65				1a_B10_Pl-b	54.65
1a_B10_MI-c	closed	35	61.02	1.05	14.02	7.51	0.20	2.08	4.34	5.48	3.10	0.49	134	5709	1286						1a_B10_Pl-c	54.77				1a_B10_Pl-b	54.65
1a_B10_MI-d	closed	46	62.30	1.26	14.13	6.47	0.18	1.71	3.95	5.69	3.18	0.55	184	4427	1051	1.62	0.02	423	11		1a_B10_Pl-d	55.48				1a_B10_Pl-b	54.65
1a_B10_MI-e	closed	45	61.32	1.34	13.90	7.43	0.18	2.00	4.24	5.37	3.16	0.42	134	5017	1195						1a_B10_Pl-e	55.04				1a_B10_Pl-b	54.65
1a_B10_MI-f	closed	55	62.30	1.24	13.88	6.67	0.19	1.77	4.02	5.65	3.11	0.58	155	4729	1061						1a_B10_Pl-f	58.12				1a_B10_Pl-b	54.65
1a_B15_MI-a	closed	30	60.38	1.54	14.11	8.66	0.27	2.32	4.52	4.00	3.05	0.35	1910	5698	268	2.33	0.02	96	3							1a_B15_Pl-e Line 028	51.85
1a_B15_MI-b	closed	25	61.92	1.08	14.65	7.31	0.17	1.86	3.82	4.45	3.47	0.42	1330	5724	1475											1a_B15_Pl-e Line 028	51.85
1a_B15_MI-c	closed	30	60.44	1.19	14.21	8.64	0.28	2.20	4.32	4.05	3.36	0.37	1758	5854	1645											1a_B15_Pl-e Line 028	51.85
1a_B15_MI-d	closed															0.86	0.02	136	3
1a_B9_MI-a	closed	15	59.82	1.45	13.82	8.47	0.22	2.53	4.90	4.89	2.78	0.49	154	5257	1060						1a_B9_Pl-a	53.55				1a_B9_Pl-i	52.56
1a_B9_MI-b	closed	15	59.62	1.45	13.88	8.49	0.24	2.65	4.39	5.17	2.99	0.38	72	6070	1152						1a_B9_Pl-b	75.25				1a_B9_Pl-i	52.56
1a_B9_MI-c	closed	33	60.06	1.44	13.25	8.87	0.25	2.82	4.01	4.85	3.34	0.37	228	6044	966						1a_B9_Pl-c	73.45				1a_B9_Pl-i	52.56
1a_B9_MI-d	closed	24	59.66	1.40	13.26	9.05	0.27	3.14	4.28	4.78	2.95	0.46	241	5643	1364						1a_B9_Pl-d	78.57				1a_B9_Pl-i	52.56
11-1t_clot2-m11	closed	36	62.60	0.82	13.36	6.80	0.16	4.48	3.10	4.29	3.14	0.24	890	3028	0						Fo82	82						1137.30	8.92
11-1s_clot4-m1	closed	16	65.82	1.41	14.57	5.54	0.15	1.25	3.31	3.63	3.54	0.27	434	3520	1055						11-1s_clot4-1	oxide
1a_A22-MIb	matrix		65.15	1.06	14.64	4.88	0.18	1.26	3.42	5.30	3.30	0.28	1216	3422	558						1a_A22-Pxb	72.32	3.44	69.83	26.73
1a_A24_MI-f	matrix		65.35	0.64	14.50	5.20	0.11	1.32	3.44	5.60	3.14	0.29	514	3184	353						1a_A24_Px-b	71.95	3.24	69.62	27.14
1a_B8_MI-a	matrix		64.67	0.65	14.65	4.67	0.12	1.23	3.42	6.40	3.36	0.29	936	3305	1220						1a_B8_Px-a	75.56	42.85	43.18	13.97
1a_B14_MI-b	matrix		65.58	0.88	13.73	4.96	0.13	1.32	3.44	6.00	3.32	0.29	61	3070	324						1a_B14_Px-b	70.50	3.58	67.97	28.45
1a_B19_MI-e	matrix		65.03	0.76	14.65	6.03	0.11	1.74	4.07	4.35	2.64	0.27	198	2517	923						1a_B19_Px-e	70.20	3.26	67.91	28.83
1a_B19_MI-g	matrix		65.42	1.16	14.39	5.92	0.12	1.40	3.17	4.65	3.11	0.29	546	3004	192
1a_B21_MI-d	matrix		64.80	0.76	14.16	5.28	0.15	1.36	3.53	6.18	3.12	0.26	10	3326	655						1a_B21_Px-d	72.79	40.88	43.03	16.09
1a_B22_MI-c	matrix		59.61	1.48	14.38	9.16	0.16	2.07	5.19	4.48	2.53	0.42	1450	3573	280						1a_B22_Px-i Line 017	72.91	40.43	43.44	16.14
1a_B22_MI-d	matrix		60.45	1.12	15.03	8.11	0.14	2.12	5.21	4.53	2.54	0.33	837	3093	255						1a_B22_Px-h Line 013	71.86	40.09	43.05	16.86
1a_B22_MI-e	matrix		61.90	1.04	15.31	6.84	0.10	1.88	4.77	4.79	2.66	0.34	622	3090	61						1a_B22_Px-e	81.06	42.29	46.78	10.93
1a_C3_MI-g	matrix		65.17	0.91	14.56	5.58	0.11	1.29	3.42	5.01	3.14	0.27	954	3472	1036						1a_C3_Px-g	72.18	40.34	43.06	16.59
1a_C3_MI-h	matrix		65.31	0.84	14.62	5.51	0.17	1.28	3.51	4.85	3.18	0.29	814	3355	121						1a_C3_Px-g	72.18	40.34	43.06	16.59
1a_C5_MI-a	matrix		64.31	0.86	14.43	6.34	0.18	1.69	4.25	4.51	2.86	0.24	62	3057	236						1a_C5_Px-a	69.37	3.93	66.64	29.43
1a_C10_MI-a	matrix		63.07	0.79	14.77	6.93	0.20	1.79	4.33	4.54	2.76	0.38	671	3186	581						1a_C10_Px-a	76.10	31.52	52.11	16.37
1a_D5_MI-c	matrix		65.71	1.01	14.32	5.34	0.15	1.26	3.68	4.64	3.11	0.31	832	3176	709						1a_D5_Px-c	72.68	40.69	43.11	16.21
11-1s_px1-m2	matrix		66.36	0.91	14.92	4.68	0.17	1.42	3.46	3.92	3.56	0.32	219	2387	318						11-1s_px1-5	77.66	38.03	48.13	13.84
11-1s_px1-m3	matrix		63.49	0.97	14.94	6.06	0.17	1.97	4.58	4.11	3.13	0.25	0	2597	892						11-1s_px1-5	77.66	38.03	48.13	13.84
11-1t_pl7-m3	matrix		64.20	0.91	15.09	5.37	0.17	1.88	4.21	4.44	3.21	0.27	450	2171	10						11-1t_pl7-7	73.35	42.12	42.46	15.42
11-1t_px1-m11	matrix		65.48	0.85	14.55	5.06	0.13	1.22	3.32	4.98	3.67	0.28	667	3335	696
11-1t_px1-m8	matrix		64.30	0.87	15.21	5.57	0.19	1.78	4.00	4.29	3.18	0.25	304	2357	943						11-1t_px1-8	75.23	41.96	43.66	14.38
11-1t_px1-m9	matrix		65.96	0.92	14.84	4.86	0.16	1.29	3.52	4.40	3.43	0.30	632	2672	0						11-1t_px1-9	74.90	41.70	43.67	14.63
11-1t_px3-m2	matrix		64.14	0.91	15.06	5.06	0.10	1.81	4.44	4.56	3.33	0.30	178	2093	859
11-1t_px3-m3	matrix		65.25	0.80	14.40	5.26	0.20	1.47	3.86	4.62	3.43	0.31	721	3103	158						11-1t_px3-3 Line 002	71.10	3.42	68.67	27.91
11-1s_pl6-m2	matrix		64.41	0.80	14.85	5.40	0.12	1.64	4.26	4.53	3.29	0.32	119	2934	701
11-1s_pl6-m3	matrix		64.32	0.87	14.14	5.77	0.13	1.80	4.33	4.52	3.35	0.25	1020	3069	1158
11-1t_clot1-10	matrix		65.30	0.82	15.03	5.04	0.14	1.49	3.70	4.44	3.41	0.30	10	2266	1153
11-1t_clot1-m11	matrix		65.52	0.88	14.81	5.01	0.17	1.54	3.77	4.34	3.41	0.28	238	2407	20
11-1t_clot1-m3	matrix		64.95	0.95	14.97	5.18	0.18	1.58	3.83	4.35	3.36	0.33	236	2301	659
11-1t_clot1-m4	matrix		63.56	0.85	14.97	6.13	0.15	1.87	4.34	4.43	3.05	0.28	39	2396	1237
11-1t_clot1-m5	matrix		65.47	0.87	15.02	4.91	0.10	1.46	3.71	4.47	3.42	0.28	69	2358	594						11-1t_clot1-3	50.42
11-1t_clot1-m8	matrix		65.65	0.89	14.73	4.78	0.20	1.45	3.54	4.71	3.47	0.26	315	2066	856
11-1t_clot1-m9	matrix		66.12	0.81	14.71	4.63	0.14	1.34	3.52	4.66	3.53	0.27	119	2485	0
11-1t_clot2-m10	matrix		63.46	0.92	15.06	5.74	0.16	2.05	4.34	4.46	3.12	0.32	147	2574	914
11-1t_clot2-m8	matrix		65.23	0.95	14.94	4.84	0.14	1.70	3.90	4.36	3.26	0.29	254	2304	1347
11-1t_clot2-m8b	matrix		63.18	0.79	15.18	5.74	0.17	2.13	4.80	4.30	2.99	0.29	301	2555	1448
11-1t_clot2-m8c	matrix		65.28	0.84	15.00	5.08	0.12	1.53	4.02	4.31	3.26	0.26	272	2072	496
11-1t_clot2-m8d	matrix		62.49	0.82	15.03	6.13	0.22	2.16	5.27	4.33	2.87	0.25	301	2225	1632
11-1t_clot2-m8e	matrix		65.79	0.86	14.89	4.92	0.18	1.28	3.52	4.45	3.51	0.24	69	2768	712
11-1t_pl1-m2	matrix		65.75	0.84	14.63	4.77	0.16	1.23	3.58	4.88	3.50	0.26	699	3181	158
11-1t_pl1-m4	matrix		66.68	0.81	14.76	4.42	0.14	1.28	3.08	4.49	3.71	0.29	344	2390	757						11-1t_pl1-4	52.62
11-1t_pl1-m5	matrix		63.15	0.89	14.99	5.81	0.18	2.23	4.83	4.20	2.92	0.28	832	2686	1665
11-1t_pl1-m6	matrix		66.86	0.84	14.66	4.51	0.13	1.22	3.40	4.34	3.52	0.25	375	2425	0
11-1t_pl1-m7	matrix		61.99	0.91	15.52	5.99	0.16	2.66	5.22	4.18	2.79	0.27	408	2198	607
11-1t_pl2-m3	matrix		64.83	0.77	14.71	4.86	0.17	1.45	3.76	5.11	3.58	0.30	744	3381	347						11-1t_pl3a Line 003	50.61
11-1t_pl2-m4	matrix		65.00	0.84	14.56	4.71	0.17	1.36	3.54	5.35	3.80	0.26	336	3234	504						11-1t_pl2-3	49.90
11-1t_pl2-m5	matrix		65.99	0.98	14.95	4.66	0.13	1.33	3.45	4.42	3.47	0.26	857	2401	151						11-1t_pl2a Line 029	48.56
11-1t_pl4-m2	matrix		66.51	0.74	15.03	4.84	0.15	1.35	3.38	3.88	3.55	0.28	505	2435	0						11-1t_pl4-3	49.09
11-1t_pl4-m3	matrix		65.58	0.90	14.89	5.11	0.14	1.31	3.63	4.26	3.46	0.26	922	3296	118						11-1t_pl4-4	53.26
11-1t_pl5-m1	matrix		65.26	0.82	14.38	4.96	0.16	1.55	4.10	4.68	3.34	0.30	563	2667	1225						11-1t_pl5-3	52.37
11-1t_pl5-m2	matrix		64.89	0.83	14.76	5.30	0.15	1.70	4.11	4.30	3.33	0.26	424	2950	306						11-1t_pl5-3	52.37
11-1t_pl5-m3	matrix		62.71	0.87	15.28	6.15	0.19	2.24	4.85	4.13	2.94	0.30	118	2572	660
11-1t_pl5-m4	matrix		66.34	0.79	15.05	4.71	0.16	1.51	3.55	3.85	3.46	0.28	238	2627	0						11-1t_pl5-8	44.85
11-1t_pl5-m5	matrix		63.11	0.94	15.26	5.88	0.19	2.24	4.77	4.10	2.93	0.29	197	2621	20
11-1t_pl5-m6	matrix		66.10	0.95	14.74	4.93	0.13	1.55	3.78	3.82	3.39	0.31	402	2164	490
11-1t_pl5-m7	matrix		62.65	0.83	15.31	6.08	0.20	2.39	5.08	3.93	2.89	0.25	197	2602	1005
11-1t_pl7-m1	matrix		61.00	0.92	14.99	6.99	0.20	2.63	5.81	4.14	2.60	0.26	994	2795	709						11-1t_pl7-1	56.16
11-1t_pl7-m2	matrix		62.29	0.85	15.18	5.95	0.19	2.74	5.31	4.05	2.77	0.27	807	2716	453						11-1t_pl7-1	56.16
11-1t_pl7-m3	matrix		64.20	0.91	15.09	5.37	0.17	1.88	4.21	4.44	3.21	0.27	450	2171	10						11-1t_pl7-1	56.16
11-1t_pl7-m4	matrix		61.05	0.98	15.44	6.61	0.22	2.81	5.42	4.22	2.59	0.25	860	2510	702						11-1t_pl7-1	56.16
11-1t_pl7-m5	matrix		65.25	0.84	15.19	4.94	0.17	1.53	3.77	4.33	3.41	0.29	391	2442	0						11-1t_pl7-5	45.39
11-1t_pl8-m4	matrix		65.74	0.77	14.66	4.70	0.14	1.20	3.24	5.22	3.59	0.25	1001	3181	624						11-1t_pl8-1 Line 005	50.38
11-1t_px1-m10	matrix		65.59	0.86	14.55	5.01	0.20	1.24	3.31	4.80	3.71	0.28	923	3328	147						11-1t_px1-11	52.52
11-1t_px3-m1	matrix		64.17	0.90	14.54	5.34	0.14	1.83	4.55	4.61	3.11	0.33	839	2951	1046						11-1t_px3-8	51.54
1a_A17_MI-b	matrix		64.77	0.80	14.54	4.79	0.16	1.20	3.28	6.26	3.35	0.30	939	2977	1564						1a_A17_Pl-b	47.02
1a_A2_MI-a	matrix		58.40	1.14	15.14	9.25	0.16	2.96	6.18	3.84	2.18	0.30	806	2469	1220						11-1a_A2-T1 Line 007	80.52
1a_A2_MI-b	matrix		57.44	1.31	13.99	10.93	0.21	3.19	6.58	3.47	2.01	0.32	2356	2849	272						11-1a_A2-T2 Line 006	84.88
1a_A21_MI-c	matrix		65.39	0.45	14.62	5.08	0.09	1.41	3.50	5.55	3.21	0.29	591	3402	143						1a_A21_Pl-e	49.86
1a_A22-MId	matrix		65.28	0.81	15.06	4.67	0.18	1.23	3.63	5.18	3.22	0.26	758	3519	552						1a_A22-ple	59.13
1a_A23_MI-e	matrix		65.54	0.91	14.90	4.75	0.03	1.08	3.53	5.50	3.20	0.18	395	3314	71						1a_A23_Pl-e Line 012	50.03
1a_A24_MI-g	matrix		65.83	0.37	14.25	5.05	0.16	1.24	3.24	5.90	3.25	0.26	1000	3413	0						1a_A24_Pl-i Line 032	51.06
1a_A24_MI-gbis	matrix		65.00	0.78	14.34	4.96	0.15	1.25	3.29	6.44	3.06	0.25	113	3279	1271						1a_A24_Pl-i Line 032	51.06
1a_A25_MI-f	matrix		64.16	0.94	13.91	5.43	0.17	1.40	3.83	6.28	3.20	0.29	111	3352	425						1a_A25_Pl-f	46.32
1a_A26_MI-a	matrix		64.66	0.82	13.77	5.77	0.15	1.70	4.12	4.94	3.30	0.32	92	2880	1384						1a_A26_Pl-a	61.06
1a_B10_MI-g	matrix		65.03	0.92	14.51	4.63	0.12	1.20	3.53	6.21	3.20	0.26	81	3328	639						1a_B10_Pl-g	53.52
1a_B13_MI-a	matrix		61.32	1.12	14.00	8.00	0.17	2.34	5.18	4.50	2.59	0.35	446	3124	568						1a_B13_Pl-a	51.28
1a_B14_MI-a	matrix		64.34	0.95	14.32	5.07	0.15	1.20	3.37	6.53	3.32	0.29	71	3452	911						1a_B14_Pl-a Line 061	41.70
1a_B15_MI-d	matrix		64.94	0.82	14.24	5.65	0.16	1.37	3.79	5.15	3.15	0.31	837	3398	0						1a_B15_Pl-d	52.31
1a_B8_MI-a	matrix		64.67	0.65	14.65	4.67	0.12	1.23	3.42	6.40	3.36	0.29	936	3305	1220						1a_B8_Pl-a	48.63
1a_B8_MI-b	matrix		65.33	0.77	14.74	4.70	0.06	1.18	3.34	5.83	3.32	0.26	358	3311	807						1a_B8_Pl-a	48.63
1a_B9_MI-f	matrix		64.54	0.64	14.28	5.09	0.16	1.30	3.37	6.61	3.29	0.29	171	3424	582						1a_B9_Pl-f	59.45
1a_C10_MI-a	matrix		63.07	0.79	14.77	6.93	0.20	1.79	4.33	4.54	2.76	0.38	671	3186	581						1a_C10_T1 Line 001	84.99
1a_C5_MI-a	matrix		64.31	0.86	14.43	6.34	0.18	1.69	4.25	4.51	2.86	0.24	62	3057	236						1a_C5_Pl-a	50.11
1a_C5_MI-b	matrix		65.54	0.97	14.28	5.31	0.16	1.32	3.58	4.95	3.14	0.30	696	3244	614						1a_C5_Pl-b	52.22
1a_C6_MI-a	matrix		64.32	1.03	14.57	5.60	0.15	1.70	4.11	4.82	3.02	0.31	175	2848	681	0.52	0.00	120	5		1a_C6_Pl-a	53.82
1a_B19_MI-f	open		65.33	0.90	14.14	5.71	0.20	1.39	3.42	4.93	3.24	0.28	626	3486	465						1a_B19_Px-f	70.70	2.77	68.74	28.49
1a_A12-MIb	open		64.91	0.93	14.94	5.59	0.20	1.25	3.49	4.62	3.15	0.33	1602	3331	861
1a_A17_MI-a	open	52	66.09	0.72	14.33	4.76	0.02	1.20	3.22	5.79	3.16	0.23	969	3392	577						1a_A17_Pl-a	48.23
1a_A22-MIc	open	30	66.15	0.83	14.82	4.54	0.09	1.21	3.35	4.92	3.35	0.30	496	3353	662						1a_A22-ple	59.13
1a_B9_MI-e	open	28	59.99	1.26	13.74	7.69	0.26	2.38	4.10	6.69	2.88	0.47	101	4327	966						1a_B9_Pl-e	60.67
11-1t_clot1-m1	clot		62.10	1.23	15.47	7.39	0.18	1.73	4.44	3.39	3.01	0.40	1815	4175	486						11-1t_clot1-1	71.35	44.16	39.84	16.00
11-1t_clot2-m5	clot		63.11	1.07	14.87	6.45	0.21	1.73	3.91	4.32	3.31	0.54	706	3522	667						11-1t_clot2-18 Line 026	68.29	40.90	40.36	18.74
11-1t_clot2-m7	clot		64.49	0.96	15.02	5.56	0.16	1.51	3.63	4.42	3.50	0.40	638	2797	0						11-1t_clot2-15	69.21	39.88	41.60	18.51
11-1t_clot2-m9	clot		62.54	0.98	15.04	6.21	0.19	1.60	4.17	4.94	3.30	0.46	827	3474	1388						11-1t_clot2-17	71.99	43.89	40.39	15.72
11-1t_clot7-m5	clot		61.81	1.07	14.68	7.83	0.20	2.26	5.09	3.84	2.61	0.29	197	2998	10						11-1t_pl7-7	73.35	42.12	42.46	15.42
11-1s_clot4-m2	clot		59.11	1.21	14.84	8.78	0.23	2.91	5.79	3.85	2.51	0.32	558	2840	1038						11-1s_clot4-2	63.10
11-1s_clot4-m3	clot		60.48	1.07	15.28	8.16	0.18	2.16	4.64	4.32	3.05	0.36	316	2644	59
11-1t_clot1-m1	clot		62.10	1.23	15.47	7.39	0.18	1.73	4.44	3.39	3.01	0.40	1815	4175	486
11-1t_clot1-m2	clot		61.89	1.25	14.94	7.52	0.26	1.88	4.52	3.58	2.98	0.45	2041	4209	1203
11-1t_clot1-m6	clot		62.75	1.29	13.82	7.44	0.24	1.86	4.38	3.84	3.15	0.57	1629	4888	0						11-1t_clot1-12	66.85
11-1t_clot1-m7	clot		63.58	0.94	14.75	6.10	0.23	1.62	3.79	4.63	3.30	0.47	760	3798	1302
11-1t_clot2-m1	clot		64.11	0.77	15.18	5.44	0.14	1.59	3.85	4.65	3.44	0.48	591	2442	453						11-1t_clot2-1	66.22
11-1t_clot2-m2	clot		63.31	0.72	14.73	6.24	0.19	1.82	4.28	4.47	3.26	0.54	703	3742	0						11-1t_clot2-2	91.69
11-1t_clot2-m3	clot		63.68	0.87	15.01	6.01	0.16	1.62	4.08	4.40	3.28	0.44	578	2654	1097						11-1t_clot2-3	66.33
11-1t_clot2-m4	clot		63.23	0.85	15.00	6.61	0.18	1.85	4.31	3.96	3.07	0.46	751	3223	801						11-1t_clot2-4	62.38
11-1t_clot2-m5	clot		63.11	1.07	14.87	6.45	0.21	1.73	3.91	4.32	3.31	0.54	706	3522	667						11-1t_clot2-5	68.85
11-1t_clot2-m6	clot		65.39	0.71	15.12	5.28	0.17	1.60	3.49	3.80	3.46	0.52	415	2600	1572						11-1t_clot2-6	65.63
11-1t_clot2-m7	clot		64.49	0.96	15.02	5.56	0.16	1.51	3.63	4.42	3.50	0.40	638	2797	0						11-1t_clot2-7	63.25
11-1t_clot2-m9	clot		62.54	0.98	15.04	6.21	0.19	1.60	4.17	4.94	3.30	0.46	827	3474	1388						11-1t_clot2-9	58.33
11-1t_clot7-m1	clot		61.59	1.11	15.29	7.33	0.15	1.90	4.90	4.04	2.99	0.32	372	2926	462
11-1t_clot7-m2	clot		63.33	0.96	14.98	6.30	0.16	2.25	4.37	3.83	3.14	0.26	277	2635	1297						11-1t_clot7-2	59.29
11-1t_clot7-m3	clot		62.35	1.16	15.34	6.67	0.19	2.03	4.75	3.87	2.92	0.36	343	2902	294
11-1t_clot7-m4	clot		60.10	1.32	14.60	8.54	0.24	2.41	5.19	3.97	2.78	0.36	543	4121	168
11-1t_clot7-m5	clot		61.81	1.07	14.68	7.83	0.20	2.26	5.09	3.84	2.61	0.29	197	2998	10
11-1t_clot7-m6	clot		61.31	1.04	14.01	8.01	0.26	2.90	5.11	3.86	2.71	0.32	990	3441	245						11-1t_clot7-1	62.35
Kombiu
RBL12-26b_E-MIc	closed	120	50.40	1.25	14.13	13.75	0.22	6.45	10.67	2.46	0.43	0.15	153	849	0	0.47	0.00	298	9		12-26b_E-clot2	46.22	44.44	9.34	82.63
12-26b_B-m13	closed	19	48.86	0.88	16.81	10.38	0.17	6.72	11.96	2.43	0.60	0.13	4730	682	1177	3.15	0.01	725	14		12-26b_B-14	81.13						1090.50	9.13
12-26b_B-m14	closed	30	48.66	0.92	15.09	11.76	0.20	7.57	11.96	2.07	0.54	0.11	4165	435	269	3.19	0.02	642	21		12-26b_B-14	81.12						1116.20	6.94
RBL12-26b_E-MIa	closed	121	48.86	0.81	16.42	10.25	0.19	8.14	11.89	1.96	0.22	0.14	3880	669	0	2.34	0.01	458	16		12-26b_E-clot1	83.79						1121.30	0
RBL12-26b_C-MIa	closed	39	48.18	0.85	15.61	11.80	0.22	8.09	11.91	1.92	0.21	0.13	4497	788	0	3.24	0.01	609	9		12-26b_C-clot1	81.89						1126.80	5.06
RBL12-26b_C-Mib	closed	34	48.42	0.83	15.37	11.89	0.20	8.15	11.83	1.79	0.28	0.14	3965	772	0	3.13	0.02	618	11		12-26b_C-clot1	81.89						1129.10	7.64
12-26b_B-m3	matrix		50.39	1.36	13.29	14.19	0.25	5.96	10.75	2.46	0.95	0.19	432	959	516
12-26b_B-m4	matrix		50.30	1.28	13.43	13.91	0.26	5.76	11.29	2.49	0.84	0.20	263	952	1145
12-26b_B-m5	matrix		51.32	1.21	13.54	12.52	0.26	5.86	11.48	2.61	0.87	0.22	332	713	0
12-26b_B-m9	matrix		51.38	1.35	13.69	12.58	0.20	5.89	11.30	2.37	0.91	0.17	545	768	273
12-26b_B-m10	matrix		49.98	1.27	14.46	13.04	0.18	5.97	11.27	2.65	0.83	0.17	899	808	71
12-26b_B-m1	clot		50.43	1.19	14.14	12.94	0.26	6.39	11.02	2.60	0.76	0.12	386	985	71
12-26b_B-m2	clot		50.79	1.23	13.92	13.18	0.24	5.76	11.60	2.08	0.81	0.21	780	985	103
12-26b_B-m6	clot		50.81	1.27	14.02	12.78	0.22	6.37	11.17	2.26	0.73	0.23	182	686	454
12-26b_B-m7	clot		50.75	1.35	14.42	12.88	0.26	5.60	11.00	2.59	0.88	0.19	271	682	0
12-26b_B-m8	clot		50.36	1.21	14.09	12.98	0.28	6.04	11.55	2.26	0.80	0.20	1522	903	0
12-26b_B-m12	clot		49.78	1.23	14.51	13.94	0.23	5.52	11.29	2.22	0.84	0.24	765	865	362
